# Supplementary material for: Robust signal peptides for protein secretion in Yarrowia lipolytica: identification and characterization of novel secretory tags
Source: PubMed Central journal article supplement (PMC5959983; doi:10.1007/s00253-018-8966-9), 2018-04-27
Supplement: 253_2018_8966_MOESM1_ESM.pdf [file 253_2018_8966_MOESM1_ESM.pdf]

## Online Resources

### Applied Microbiology and Biotechnology

Robust signal peptides for protein secretion in *Yarrowia lipolytica*: identification and characterization of novel secretory tags.

Ewelina Celińska\*<sup>1</sup>, Monika Borkowska<sup>1</sup>, Wojciech Białas<sup>1</sup>, Paulina Korpys<sup>1</sup>, Jean-Marc Nicaud<sup>2</sup>

<sup>1</sup>Department of Biotechnology and Food Microbiology, Poznan University of Life Sciences, ul. Wojska Polskiego 48, 60-627 Poznań, Poland

<sup>2</sup>Micalis Institute, INRA-AgroParisTech, UMR1319, Team BIMLip: Integrative Metabolism of Microbial Lipids, Domaine de Vilvert, 78352 Jouy-en-Josas, France

\*Corresponding author: Ewelina Celińska, phone: +48618466007, e-mail:

[ewelina.celinska@up.poznan.pl](mailto:ewelina.celinska@up.poznan.pl), ORCID 0000-0001-8372-8459

## Online Resource ESM\_1. *E. coli* strains and bacterial plasmids used in this study

|                      |                                                                                                                                                                          |
|----------------------|--------------------------------------------------------------------------------------------------------------------------------------------------------------------------|
| <i>E. coli</i> JM109 | characteristics: <i>F'</i> ( <i>traD36, proAB+, lacIq, Δ(lacZ)M15</i> ), <i>endA1, recA1, hsdR17(rk-mk+)</i> , <i>mcrA, supE44, λ, gyrA96, relA1, Δ(lacproAB), thi-1</i> |
|----------------------|--------------------------------------------------------------------------------------------------------------------------------------------------------------------------|

All the following strains are descendants of JM109 and bear the corresponding GGVs (TOPO backbone + insert)

| <i>E. coli</i> strain No | Type and signature of the GG element | Backbone Vector | Resistance | Insert type                  |
|--------------------------|--------------------------------------|-----------------|------------|------------------------------|
| GGE 0065                 | GGV0065                              | TOPO            | KanR       | SSP 1                        |
| GGE 0066                 | GGV0066                              | TOPO            | KanR       | SSP 2                        |
| GGE 0063                 | GGV0063                              | TOPO            | KanR       | SSP 3                        |
| GGE 0067                 | GGV0067                              | TOPO            | KanR       | SSP 4                        |
| GGE 0068                 | GGV0068                              | TOPO            | KanR       | SSP 5                        |
| GGE 0069                 | GGV0069                              | TOPO            | KanR       | SSP 6                        |
| GGE 0070                 | GGV0070                              | TOPO            | KanR       | SSP 7                        |
| GGE 0071                 | GGV0071                              | TOPO            | KanR       | SSP 8                        |
| GGE 0072                 | GGV0072                              | TOPO            | KanR       | SSP 9                        |
| GGE 0062                 | GGV0062                              | TOPO            | KanR       | SSP 10                       |
| GGE 0073                 | GGV0073                              | TOPO            | KanR       | SoAMY_no ATG_Bsal_del        |
| GGE 0064                 | GGV0064                              | TOPO            | KanR       | TIGAMY_no ATG                |
| GGE 0003                 | GGV0003                              | TOPO            | KanR       | P1 TEF                       |
| GGE 0016                 | GGV0016                              | TOPO            | KanR       | T3 Lip2                      |
| GGE 0013                 | GGV0013                              | TOPO            | KanR       | M <i>URA3ex</i>              |
| GGE 0037                 | GGV0037                              | TOPO            | KanR       | InsUP_zeta NotI              |
| GGE 0038                 | GGV0038                              | TOPO            | KanR       | InsDOWN_zeta NotI            |
| GGE 0029                 |                                      | pSB1A3-RFP      | AmpR       | pSB1A3-RFP (iGEM collection) |

All the following strains are descendants of JM109 and bear the following GGVA's ( pSB1A3 backbone + GGA with the following constant elements: *InsUP-zeta NotI\_M\_URA3ex\_pTEF\_\**variable insert\*\_T3 tLip2\_InsDOWN\_zeta NotI)

| <i>E. coli</i> strain No | Type and signature of GG element | Backbone Vector | Resistance | *variable insert* type |
|--------------------------|----------------------------------|-----------------|------------|------------------------|
| GGE 0076                 | GGVA0076                         | pSB1A3          | AmpR       | SSP1 TIGAMY            |
| GGE 0078                 | GGVA0078                         | pSB1A3          | AmpR       | SSP2 TIGAMY            |
| GGE 0079                 | GGVA0079                         | pSB1A3          | AmpR       | SSP3 TIGAMY            |
| GGE 0080                 | GGVA0080                         | pSB1A3          | AmpR       | SSP4 TIGAMY            |
| GGE 0081                 | GGVA0081                         | pSB1A3          | AmpR       | SSP5 TIGAMY            |
| GGE 0082                 | GGVA0082                         | pSB1A3          | AmpR       | SSP6 TIGAMY            |
| GGE 0083                 | GGVA0083                         | pSB1A3          | AmpR       | SSP7 TIGAMY            |
| GGE 0084                 | GGVA0084                         | pSB1A3          | AmpR       | SSP8 TIGAMY            |
| GGE 0085                 | GGVA0085                         | pSB1A3          | AmpR       | SSP9 TIGAMY            |
| GGE 0086                 | GGVA0086                         | pSB1A3          | AmpR       | SSP10 TIGAMY           |
| GGE 0087                 | GGVA0087                         | pSB1A3          | AmpR       | SSP1 SoAMY             |
| GGE 0088                 | GGVA0088                         | pSB1A3          | AmpR       | SSP2 SoAMY             |
| GGE 0089                 | GGVA0089                         | pSB1A3          | AmpR       | SSP3 SoAMY             |
| GGE 0090                 | GGVA0090                         | pSB1A3          | AmpR       | SSP4 SoAMY             |
| GGE 0091                 | GGVA0091                         | pSB1A3          | AmpR       | SSP5 SoAMY             |
| GGE 0092                 | GGVA0092                         | pSB1A3          | AmpR       | SSP6 SoAMY             |
| GGE 0093                 | GGVA0093                         | pSB1A3          | AmpR       | SSP7 SoAMY             |
| GGE 0094                 | GGVA0094                         | pSB1A3          | AmpR       | SSP8 SoAMY             |
| GGE 0095                 | GGVA0095                         | pSB1A3          | AmpR       | SSP9 SoAMY             |
| GGE 0096                 | GGVA0096                         | pSB1A3          | AmpR       | SSP10 SoAMY            |

| <b>Online Resource ESM_2. <i>Y. lipolytica</i> strains and expression cassettes used in this study</b>                                                                                                                                                                                                                                                                                                                                                               |                                                                                                                                                                                                                                                   |                               |
|----------------------------------------------------------------------------------------------------------------------------------------------------------------------------------------------------------------------------------------------------------------------------------------------------------------------------------------------------------------------------------------------------------------------------------------------------------------------|---------------------------------------------------------------------------------------------------------------------------------------------------------------------------------------------------------------------------------------------------|-------------------------------|
| <b><i>Y. lipolytica</i> Po1g</b>                                                                                                                                                                                                                                                                                                                                                                                                                                     | Genotype: <i>Mata</i> , <i>leu2-270</i> , <i>ura3-302::URA3</i> , <i>xpr2-332</i> , <i>axp-2</i><br><i>Po1g</i> is a derivative of the wild-type strain W29 (ATCC 20460; CLIB89); part of YLEX Expression Kit (Yeastern Biotech Co. Ltd., Taiwan) |                               |
| The following strains were transformed with pYLSC vector bearing respective gene of interest devoid of its native SP<br><i>pBR322</i> backbone, hybrid promoter ( <i>hp4d</i> ), <i>XPR2</i> pre-leader, <i>LEU2</i> —selection marker;<br><i>SoAMY</i> and <i>TIGAMY</i> genes were cloned in <i>SfiI/KpnI</i> sites<br><a href="http://www.yeastern.com/Products.php?pid=273">http://www.yeastern.com/Products.php?pid=273</a> (Yeastern Biotech Co. Ltd., Taiwan) |                                                                                                                                                                                                                                                   |                               |
| <b><i>Y. lipolytica</i> 1.1.2</b>                                                                                                                                                                                                                                                                                                                                                                                                                                    | <i>Po1g</i> derivative bearing pYLSC- <i>SoAMY</i> construct<br>Used as a positive control in <i>microSIT</i> assay                                                                                                                               |                               |
| <b><i>Y. lipolytica</i> 2.1.2</b>                                                                                                                                                                                                                                                                                                                                                                                                                                    | <i>Po1g</i> derivative bearing pYLSC- <i>TIGAMY</i> construct<br>Used as a positive control in <i>microSNT</i> assay                                                                                                                              |                               |
| <b><i>Y. lipolytica</i> JMY2101</b>                                                                                                                                                                                                                                                                                                                                                                                                                                  | Genotype: <i>MATa</i> , <i>ura3-302</i> , <i>xpr2-322+pXPR2-SUC2</i><br><i>JMY2101</i> is a derivative of the wild-type strain W29 (ATCC 20460; CLIB89)                                                                                           |                               |
| The following strains were transformed with corresponding GGA (GGA released from <i>pSB1A3</i> backbone) and contain the following constant elements integrated with the genome:<br><i>InsUP-zeta_NotI_M_Ura3ex_pTEF_*variable insert*_T3 tLip2_InsDOWN_zeta_NotI</i>                                                                                                                                                                                                |                                                                                                                                                                                                                                                   |                               |
| <b><i>Y. lipolytica</i> strain No</b>                                                                                                                                                                                                                                                                                                                                                                                                                                | <b>Type and signature of the GG element</b>                                                                                                                                                                                                       | <b>*variable insert* type</b> |
| GGY01                                                                                                                                                                                                                                                                                                                                                                                                                                                                | GGA0076                                                                                                                                                                                                                                           | SSP1 TIGAMY                   |
| GGY02                                                                                                                                                                                                                                                                                                                                                                                                                                                                |                                                                                                                                                                                                                                                   |                               |
| GGY03                                                                                                                                                                                                                                                                                                                                                                                                                                                                |                                                                                                                                                                                                                                                   |                               |
| GGY04                                                                                                                                                                                                                                                                                                                                                                                                                                                                |                                                                                                                                                                                                                                                   |                               |
| GGY05                                                                                                                                                                                                                                                                                                                                                                                                                                                                |                                                                                                                                                                                                                                                   |                               |
| GGY10                                                                                                                                                                                                                                                                                                                                                                                                                                                                | GGA0078                                                                                                                                                                                                                                           | SSP2 TIGAMY                   |
| GGY11                                                                                                                                                                                                                                                                                                                                                                                                                                                                |                                                                                                                                                                                                                                                   |                               |
| GGY12                                                                                                                                                                                                                                                                                                                                                                                                                                                                |                                                                                                                                                                                                                                                   |                               |
| GGY13                                                                                                                                                                                                                                                                                                                                                                                                                                                                |                                                                                                                                                                                                                                                   |                               |
| GGY14                                                                                                                                                                                                                                                                                                                                                                                                                                                                |                                                                                                                                                                                                                                                   |                               |
| GGY24                                                                                                                                                                                                                                                                                                                                                                                                                                                                | GGA0079                                                                                                                                                                                                                                           | SSP3 TIGAMY                   |
| GGY27                                                                                                                                                                                                                                                                                                                                                                                                                                                                |                                                                                                                                                                                                                                                   |                               |
| GGY29                                                                                                                                                                                                                                                                                                                                                                                                                                                                |                                                                                                                                                                                                                                                   |                               |
| GGY30                                                                                                                                                                                                                                                                                                                                                                                                                                                                |                                                                                                                                                                                                                                                   |                               |
| GGY35                                                                                                                                                                                                                                                                                                                                                                                                                                                                |                                                                                                                                                                                                                                                   |                               |
| GGY37                                                                                                                                                                                                                                                                                                                                                                                                                                                                | GGA0080                                                                                                                                                                                                                                           | SSP4 TIGAMY                   |
| GGY39                                                                                                                                                                                                                                                                                                                                                                                                                                                                |                                                                                                                                                                                                                                                   |                               |
| GGY40                                                                                                                                                                                                                                                                                                                                                                                                                                                                |                                                                                                                                                                                                                                                   |                               |
| GGY41                                                                                                                                                                                                                                                                                                                                                                                                                                                                |                                                                                                                                                                                                                                                   |                               |
| GGY42                                                                                                                                                                                                                                                                                                                                                                                                                                                                |                                                                                                                                                                                                                                                   |                               |
| GGY45                                                                                                                                                                                                                                                                                                                                                                                                                                                                | GGA0081                                                                                                                                                                                                                                           | SSP5 TIGAMY                   |
| GGY46                                                                                                                                                                                                                                                                                                                                                                                                                                                                |                                                                                                                                                                                                                                                   |                               |
| GGY48                                                                                                                                                                                                                                                                                                                                                                                                                                                                |                                                                                                                                                                                                                                                   |                               |
| GGY49                                                                                                                                                                                                                                                                                                                                                                                                                                                                |                                                                                                                                                                                                                                                   |                               |
| GGY50                                                                                                                                                                                                                                                                                                                                                                                                                                                                |                                                                                                                                                                                                                                                   |                               |
| GGY60                                                                                                                                                                                                                                                                                                                                                                                                                                                                | GGA0082                                                                                                                                                                                                                                           | SSP6 TIGAMY                   |
| GGY61                                                                                                                                                                                                                                                                                                                                                                                                                                                                |                                                                                                                                                                                                                                                   |                               |
| GGY68                                                                                                                                                                                                                                                                                                                                                                                                                                                                |                                                                                                                                                                                                                                                   |                               |
| GGY65                                                                                                                                                                                                                                                                                                                                                                                                                                                                |                                                                                                                                                                                                                                                   |                               |
| GGY67                                                                                                                                                                                                                                                                                                                                                                                                                                                                |                                                                                                                                                                                                                                                   |                               |
| GGY70                                                                                                                                                                                                                                                                                                                                                                                                                                                                | GGA0083                                                                                                                                                                                                                                           | SSP7 TIGAMY                   |
| GGY71                                                                                                                                                                                                                                                                                                                                                                                                                                                                |                                                                                                                                                                                                                                                   |                               |
| GGY72                                                                                                                                                                                                                                                                                                                                                                                                                                                                |                                                                                                                                                                                                                                                   |                               |
| GGY73                                                                                                                                                                                                                                                                                                                                                                                                                                                                |                                                                                                                                                                                                                                                   |                               |
| GGY77                                                                                                                                                                                                                                                                                                                                                                                                                                                                |                                                                                                                                                                                                                                                   |                               |
| GGY97                                                                                                                                                                                                                                                                                                                                                                                                                                                                | GGA0084                                                                                                                                                                                                                                           | SSP8 TIGAMY                   |
| GGY98                                                                                                                                                                                                                                                                                                                                                                                                                                                                |                                                                                                                                                                                                                                                   |                               |
| GGY101                                                                                                                                                                                                                                                                                                                                                                                                                                                               |                                                                                                                                                                                                                                                   |                               |
| GGY102                                                                                                                                                                                                                                                                                                                                                                                                                                                               |                                                                                                                                                                                                                                                   |                               |
| GGY103                                                                                                                                                                                                                                                                                                                                                                                                                                                               | GGA0085                                                                                                                                                                                                                                           | SSP9 TIGAMY                   |
| GGY125                                                                                                                                                                                                                                                                                                                                                                                                                                                               |                                                                                                                                                                                                                                                   |                               |
| GGY126                                                                                                                                                                                                                                                                                                                                                                                                                                                               |                                                                                                                                                                                                                                                   |                               |
| GGY128                                                                                                                                                                                                                                                                                                                                                                                                                                                               |                                                                                                                                                                                                                                                   |                               |
| GGY130                                                                                                                                                                                                                                                                                                                                                                                                                                                               |                                                                                                                                                                                                                                                   |                               |

|        |         |              |
|--------|---------|--------------|
| GGY131 |         |              |
| GGY155 |         |              |
| GGY156 |         |              |
| GGY157 | GGA0086 | SSP10 TIGAMY |
| GGY159 |         |              |
| GGY160 |         |              |
| GGY172 |         |              |
| GGY173 |         |              |
| GGY175 | GGA0087 | SSP1 SoAMY   |
| GGY183 |         |              |
| GGY195 |         |              |
| GGY207 |         |              |
| GGY208 |         |              |
| GGY212 | GGA0088 | SSP2 SoAMY   |
| GGY220 |         |              |
| GGY226 |         |              |
| GGY255 |         |              |
| GGY257 |         |              |
| GGY262 | GGA0089 | SSP3 SoAMY   |
| GGY264 |         |              |
| GGY270 |         |              |
| GGY304 |         |              |
| GGY306 |         |              |
| GGY310 | GGA0090 | SSP4 SoAMY   |
| GGY314 |         |              |
| GGY316 |         |              |
| GGY331 |         |              |
| GGY332 |         |              |
| GGY337 | GGA0091 | SSP5 SoAMY   |
| GGY338 |         |              |
| GGY339 |         |              |
| GGY345 |         |              |
| GGY346 |         |              |
| GGY347 | GGA0092 | SSP6 SoAMY   |
| GGY342 |         |              |
| GGY343 |         |              |
| GGY352 |         |              |
| GGY353 |         |              |
| GGY356 | GGA0093 | SSP7 SoAMY   |
| GGY359 |         |              |
| GGY364 |         |              |
| GGY370 |         |              |
| GGY373 |         |              |
| GGY380 | GGA0094 | SSP8 SoAMY   |
| GGY383 |         |              |
| GGY389 |         |              |
| GGY394 |         |              |
| GGY395 |         |              |
| GGY397 | GGA0095 | SSP9 SoAMY   |
| GGY400 |         |              |
| GGY403 |         |              |
| GGY412 |         |              |
| GGY413 |         |              |
| GGY414 | GGA0096 | SSP10 SoAMY  |
| GGY417 |         |              |
| GGY418 |         |              |

| <b>Online Resource ESM_3. Synthetic Golden Gate Primers (GGPs) and Golden Gate Fragments (GGFs) used in this study</b> |                                                                     |                                                |
|------------------------------------------------------------------------------------------------------------------------|---------------------------------------------------------------------|------------------------------------------------|
| <b>GGPs</b>                                                                                                            |                                                                     | <b>Comments</b>                                |
| <b>Amplification of constant elements of GGAs</b>                                                                      |                                                                     |                                                |
| GGP_InsertUP_zeta_A_F_Not                                                                                              | GGTCTCTGCCTGCGGCCGctgtcgggaaccgc                                    | Amplification of GGFs                          |
| GGP_InsertUP_zeta_B_R                                                                                                  | GGTCTTACCTctagcaaagtcttctgtgc                                       |                                                |
| GGP_M_Ura3ex_B_F                                                                                                       | GGTCTTAGGTataactctgtatagcatacattatacgaag                            |                                                |
| GGP_M_Ura3ex_C_R                                                                                                       | GGTCTTAGCTtcgcttcggataactcc                                         |                                                |
| GGP_P1_TEF_C_F                                                                                                         | GGTCTTAGCTgggttgccggcg                                              |                                                |
| GGP_P1_TEF_D_R                                                                                                         | GGTCTCATTcttcgggtgtgagttgac                                         |                                                |
| GGP_T3_LIP2_E_F                                                                                                        | GGTCTGTACgttctgtgtatctaaagctattatc                                  |                                                |
| GGP_T3_LIP2_L_R                                                                                                        | GGTCTTACTCcgatttcttagaggaacgc                                       |                                                |
| GGP_InsertDOWN_zeta_L_F                                                                                                | GGTCTGAGTcatgtgtaaacactcgctctg                                      |                                                |
| GGP_InsertDOWN_zeta_M_R_Not                                                                                            | GGTCTCTCGACGGCCGCactgaaggccttctgtgag                                |                                                |
| <b>Amplification of a gene in G1 position</b>                                                                          |                                                                     |                                                |
| GGP_G_SoAMY_noSP_x_F                                                                                                   | GGGGGTCTctGCCAGAAGACCCCCAC                                          |                                                |
| GGP_G_SoAMY_noSP_K_R                                                                                                   | GGGGGTCTctGTACCTAGTGGTGGTGGTGG                                      | Amplification of variable insert R             |
| GGP_G_TIGAMY_noSP_x_F                                                                                                  | GGGGGTCTctGCCAGACCAGAAACAACCGTTC                                    |                                                |
| GGP_G_TIGAMY_noSP_K_R                                                                                                  | GGGGGTCTctGTACTCAATGATGATGATGATGATGTCTC                             | Amplification of variable insert R             |
| <b>BsaI deletion</b>                                                                                                   |                                                                     |                                                |
| SoAMY BsaI del noSP 1 F                                                                                                | CAGAAGGACCCCACTTCTAGATGGACGAAAC                                     | Deletion of BsaI site from SoAMY gene sequence |
| SoAMY BsaI del 1 R                                                                                                     | CCAGTTGGTCAGCTCAGTTCCCGtGtCACGTTTCG                                 |                                                |
| SoAMY BsaI del 2 F                                                                                                     | CATGGTTGAGTTTCGAAACGTGcaCaCGGGAAC                                   |                                                |
| SoAMY BsaI del 2 R                                                                                                     | CTAGTGGTGGTGGTGGTGCAGCTTAGCG                                        |                                                |
| <b>Amplification of variable insert</b>                                                                                |                                                                     |                                                |
| GGP_SP_B03564g_D_F                                                                                                     | ATGAAGTTCACATTTGCTGCCGTTACCGCCGCTGGCCTCGTCCGCCATTGCC                | Amplification of variable insert F             |
| GGP_SP_D20680g_D_F                                                                                                     | ATGAAGTTCTCCACCGCCCTTCTGGCTCTGGCCGCGTCCGCACTGCC                     |                                                |
| GGP_SP_E22374g_D_F                                                                                                     | ATGAAATCTCTATTGCTGTGCTGTGGCGGTCCCGGCCACTGCC                         |                                                |
| GGP_SP_D06039g_D_F                                                                                                     | ATGAAGTCTCAGCGGTCTCAATCGCTGCTGCCCTGGCCTCGTGGTGGCTGCC                |                                                |
| GGP_SP_D06149g_D_F                                                                                                     | ATGAAGCTCTCCATCGTTCTCGTGGCTCTGGCAGCCGTCTCCTCTGCC                    |                                                |
| GGP_SP_Lip2NATIVE_D_F                                                                                                  | ATGAAGCTTCCACCATCTTTTACAGCCTGCGCTACCCTGGCTGCTGCC                    |                                                |
| GGP_SP_Lip2pre 3xXA_D_F                                                                                                | ATGAAGCTGTCTACCATTCTGTTTACCGCTTGCTACTCTGGCTCTCGCTTGGCC              |                                                |
| GGP_SP_SoAMY NATIVE_D_F                                                                                                | ATGAAGGTGCTCGCCCTGCTGGTTACTGTCTGCTTTTCCGTTGCCCTGCTGCC               |                                                |
| GGP_SP_TIGAMY NATIVE_D_F                                                                                               | ATGTTATTCCAACCGACTTTGTGCGCGCCCTTGGACTCGCCGCTTGATCGTCCAAGGCGGAGATGCC |                                                |
| GGP_SP_XPR2pre_D_F                                                                                                     | ATGAAGCTCGCTACCGCCTTACTATTCTCACGGCCGTTCTTGGCC                       |                                                |
| <b>GGFs</b>                                                                                                            |                                                                     |                                                |

|                          |                                                                                                                                                                                                                                                                                                                                                                                                                                                                                                                                                                                                                                                                                                                                                                                                                                                                                                                                                                                                                                                                                                                                                                                                                                                                                                                                                                                                                                                                                                                                                                                                                                                                                                                                                                                                                                                                                                         |                                                                                                        |                                                                                                |
|--------------------------|---------------------------------------------------------------------------------------------------------------------------------------------------------------------------------------------------------------------------------------------------------------------------------------------------------------------------------------------------------------------------------------------------------------------------------------------------------------------------------------------------------------------------------------------------------------------------------------------------------------------------------------------------------------------------------------------------------------------------------------------------------------------------------------------------------------------------------------------------------------------------------------------------------------------------------------------------------------------------------------------------------------------------------------------------------------------------------------------------------------------------------------------------------------------------------------------------------------------------------------------------------------------------------------------------------------------------------------------------------------------------------------------------------------------------------------------------------------------------------------------------------------------------------------------------------------------------------------------------------------------------------------------------------------------------------------------------------------------------------------------------------------------------------------------------------------------------------------------------------------------------------------------------------|--------------------------------------------------------------------------------------------------------|------------------------------------------------------------------------------------------------|
| SoAMY nt no SP           | <p>CAGAAGGACCCCACTTCTAGATGGACGAAACACTATCGTTACCTTTCGAGTGGAAAGTGGGCCGACATTGCTCCGAGTGTGAGAACTTCTGTGGTGAAGAACCTTTGCC<br/>GGTGTTCAGGTGTCTCCCTGCTGAGTCCGTGGTCTGTAGGGCCGACCTGGTGGGAGAAGTACCAGCTGTCTCTACACCTCAACAACCGAGGCGGAGACGAGGCCG<br/>TTTCTCCGATATGTTTTCCGATGTAACAACGTGGGAATCCGAATTTACGTGGACCTGGTCCCAACACCATGGTACTTTCGAACGGCCAGGGATCTGCCGGTAACACTGCGAC<br/>CCCTTCCAAAGTCTTACCCTGCTGTCTCGTACACTCTGAGAACTCCATACCTCCTGTGACATCGATTACACTGACTGTCTTCCATTGAAACTGCGAGCTGACCGGCTCAAG<br/>GACCTGGATCAGTCCAGGACTACGTGCGAGGAAAGATCGAGGAGTACATGAAACCACTATTCTCTGGGAGTGGCCGGTTTTCGAGTGGACGCCGTAAGCATATGTGGCC<br/>CGCCGACCTCCAGGCTATCTCGGCTCCCTCAACGACCTGTCTACCGACCAGGATTTGCTTGGGTGCCGAGCTTTTCATCTTTCAGGAAGTGATTGACACTTCTACCGATCTG<br/>TCAGAACAACCTGAGTACACCGTTTTCGGCAAGGTGTGCGAGTTCCTCTTGGCAACGACCTGGGACCCGCTTTCGAGGAGAGAACCCTCTCCATTACCTGAAGAAGTGGGGTA<br/>CTGAGTGGGGCTGCTCGACGGTGGCGATACCGTTTTCTGTTCTGGACAACCACGATAACGAGCGAGACTCTCAGATTTCTGCTTACCAACGATAAGCCCTACAAGGCTG<br/>CCATGGCCTTCATGCTCGTCACTCTACGACACCACTACCGAGTCTGTCTTACAAGTTTGACTCTCGGATCAGGGTCCCCCTTCAACGGCGACGATATTCGTCTCCCG<br/>AGTTCCGCTCCGACGGAGCCTGTACCAACGGCTGGTTTTGCCAGCATCGATGGTCCCCTGTCTTCAACATGGTTGAGTTTTGAAACGTGGTCTCGGAACTGAGCTGACCACT<br/>GGTGGGACAACGGTTCGAGCAGATTGCCTTCTCGAGGTGACAAGGGCTTTACGCCGCTACTGTCAACGAGGATATCGTACCTTACTACTACCGGACTGCCGACGGTTC<br/>CTACTGTGATGTCATGCTGGCTCTGTGGTAAACGGCGCTGCACCGAAAGACTCTGACCGTGTCTGGCGGTGAGTCTACGTTGAGCTGGTGGTGTGAGCTGGAGGCTGC<br/>TGTCGCTATTCAGTCAACGCTAAGCTGACCAACCACCACCACCTAG</p>                                                                                                                                                                                                                                                                                                                                                                                                                    | codon optimized<br>sequence encoding<br>SoAMY truncated at<br>5' end to eliminate<br>its native SP     |                                                                                                |
| TIGAMY nt no SP          | <p>AGACCAGAAACAACCGTTCTCACGCAACCGGTTCTTTGGATGATTTCTGGCTGCACAATCACCAATCGCTTCCAAGGATTTTGAACAACATTGGTCCATCTGGTGCATATTC<br/>AGAAGGTGTTAATCCAGGTGTTGTTATTGCTTCCACATTAAGCAAGTCCAGATTACTTCTACACTTGGGTTAGAGATGCTGCATTGACAGTTCAATATTTGGTTGAAGAATTGG<br/>TTGCTGGTAATGCTTCTTTGCAATCTTGTATCCAAGATTACATCTTTCACAAGCTAGATTGCAAACTGTTGAAAATCCATCAGGTTCTTTGCTTCAGGTGGTTTAGGTGAACCAA<br/>AGTTCCATGTTGATGAAACTGCTTTACTGATTCTTGGGGTAGACCACAAAGAGATGGTCCACCATTGAGAGCTATTGCAATGATCTTTCGCTAACTATTTGATCGATAACGGT<br/>CATCAATCAACAGTTGAAGATATCATCTGGCCAAATCGGTAGAAACGATTTGTACATGCTTCTCAACATTGGAACGAAACTACATTCGATATCTGGGAAGAAGTTCATTTTCATC<br/>TTTCTTACTACAGCAGTTCAATATAGAGCTTTAGTCAAGGTTCTGCTTGGCATCAAAGTTGGGTACACTTGTGATAACTGTGGTTCTCAAGCACCAAAATTTGTGTTTCT<br/>GCAATCTTACTGGACTGGTTCACATATTTGGCTAATACTGGTGGTGGTAGATCTGGTAAAGATGTTTCAACTATTTAGGTGTTATTGGTCTTTGATCCAAATGCTGATTGTG<br/>ATGATGTTACATTTCAACATGTTTCAGCTAGAGCATTAGCTAACCATAAAGCAAGTTGTTGATCTTTAGATCTATGCAATTAAGTCTGGTATTCCATCAGGTTCTGCAGTTG<br/>CTGTTGGTAGATATCCAGAAGATGTTTACCAAGGTGGTCACTCATGGTACTTACTACAGCTGCAGCTGCAGAACAAATTGACGATGCAATCTATCAATGGAACCATGTTGGTCA<br/>TATCGATATCAACGCTGTTAATTTGGATTTCTTAAATCTATCTATCCATCAGCTGCAGAAGGTACATACACTTCTGATTCTACTTTCCAAGATATCATCTCAGCAGTTAGAACA<br/>TATGCTGATGTTTCTGTCTGTTATTGAAAAGTACACTCCACCAGATAATTTGTTGGCTGAACAATCCATAGAGAAACAGGTATCCATTGTCAGCTGCATCTTAACTTGGTCT<br/>TATGCTGATTGAATACAGCTGCACAAAGAGAGCTTATTGTTCCATCACCATGGAACCTCAAACCTCTACAGATTTGCTGATAAGTGTTCAGCAACTTCTGCTACAGGTCATA<br/>CGCAACCAACTAATACAGCTTGGCCAACCTACAACCTCAACCACCAGAAAGACCAGCTTACTCCACCATCTGAAGTTACTTTGACTTTTAAATGCAATGGTTGATACAGCTTTCCG<br/>GTCAAAACATATATTTGGTGGTCTATTCCAGAATTAGGTTTCATGGGACCCAGCAAACTGCTTTGTTAATGTCAGCAAACTCTGGACTCAGGTAATCCAGTTGGACATTGTCA<br/>ATTTCTTACCAGCTGGTACTTCTTTCGAATACAAGTTATTAGAAAGGATGATGGTTCATCTGATGTTGTTGGGAATCTGATCCAATAGATCATACAATGTTCCAAAAGATTGC<br/>GGTCTAACACAGCTACAGTAACTCTTGGTGGAGACATCATCATCATCATTGA</p> | codon optimized<br>sequence encoding<br>TIGAMY truncated<br>at 5' end to<br>eliminate its native<br>SP |                                                                                                |
| GGF_SP_B03564g_D_F       | SSP_1                                                                                                                                                                                                                                                                                                                                                                                                                                                                                                                                                                                                                                                                                                                                                                                                                                                                                                                                                                                                                                                                                                                                                                                                                                                                                                                                                                                                                                                                                                                                                                                                                                                                                                                                                                                                                                                                                                   | GGGGTCTCtAATGAAGTTCACATTTGCTGCCGTTACCGCCGCTGGCCTCGTCCGCCATTGCCaGAGACCCCC                               | F elements to be<br>aligned with their<br>complementary<br>strand R – not for<br>amplification |
| GGF_SP_D20680g_D_F       | SSP_2                                                                                                                                                                                                                                                                                                                                                                                                                                                                                                                                                                                                                                                                                                                                                                                                                                                                                                                                                                                                                                                                                                                                                                                                                                                                                                                                                                                                                                                                                                                                                                                                                                                                                                                                                                                                                                                                                                   | GGGGTCTCtAATGAAGTTCACACCGCCTTCTGGCTGTGGCCGCTGCCACTGCCaGAGACCCCC                                        |                                                                                                |
| GGF_SP_E22374g_D_F       | SSP_3                                                                                                                                                                                                                                                                                                                                                                                                                                                                                                                                                                                                                                                                                                                                                                                                                                                                                                                                                                                                                                                                                                                                                                                                                                                                                                                                                                                                                                                                                                                                                                                                                                                                                                                                                                                                                                                                                                   | GGGGTCTCtAATGAAATCTCTATTGCTGCTGCTGGCCGCTCCCGGCCACTGCCaGAGACCCCC                                        |                                                                                                |
| GGF_SP_D06039g_D_F       | SSP_4                                                                                                                                                                                                                                                                                                                                                                                                                                                                                                                                                                                                                                                                                                                                                                                                                                                                                                                                                                                                                                                                                                                                                                                                                                                                                                                                                                                                                                                                                                                                                                                                                                                                                                                                                                                                                                                                                                   | GGGGTCTCtAATGAAGTTCACGCGGTCTCAATCGCTGCTGCCCTGGCCTCGTGGTGGCTGCCaGAGACCCCC                               |                                                                                                |
| GGF_SP_D06149g_D_F       | SSP_5                                                                                                                                                                                                                                                                                                                                                                                                                                                                                                                                                                                                                                                                                                                                                                                                                                                                                                                                                                                                                                                                                                                                                                                                                                                                                                                                                                                                                                                                                                                                                                                                                                                                                                                                                                                                                                                                                                   | GGGGTCTCtAATGAAGTTCATCGTTCTCGTGGCTGTGGCAGCGTCTCTGCTGCCaGAGACCCCC                                       |                                                                                                |
| GGF_SP_Lip2NATIVE_D_F    | SSP_6                                                                                                                                                                                                                                                                                                                                                                                                                                                                                                                                                                                                                                                                                                                                                                                                                                                                                                                                                                                                                                                                                                                                                                                                                                                                                                                                                                                                                                                                                                                                                                                                                                                                                                                                                                                                                                                                                                   | GGGGTCTCtAATGAAGTTCACCATCTTTTACAGCCTGCGTACCCTGGCTGCTGCCaGAGACCCCC                                      |                                                                                                |
| GGF_SP_Lip2pre 3xXA_D_F  | SSP_7                                                                                                                                                                                                                                                                                                                                                                                                                                                                                                                                                                                                                                                                                                                                                                                                                                                                                                                                                                                                                                                                                                                                                                                                                                                                                                                                                                                                                                                                                                                                                                                                                                                                                                                                                                                                                                                                                                   | GGGGTCTCtAATGAAGTGTCTACCATCTGTTTACCCTTGTGCTACTCTGGCTCTGCTTGGCcaGAGACCCCC                               |                                                                                                |
| GGF_SP_SoAMY NATIVE_D_F  | SSP_8                                                                                                                                                                                                                                                                                                                                                                                                                                                                                                                                                                                                                                                                                                                                                                                                                                                                                                                                                                                                                                                                                                                                                                                                                                                                                                                                                                                                                                                                                                                                                                                                                                                                                                                                                                                                                                                                                                   | GGGGTCTCtAATGAAGTGTCTGCCTGCTGGTACTGTCTGCTTTCCGTTGCCCTGCCaGAGACCCCC                                     |                                                                                                |
| GGF_SP_TIGAMY NATIVE_D_F | SSP_9                                                                                                                                                                                                                                                                                                                                                                                                                                                                                                                                                                                                                                                                                                                                                                                                                                                                                                                                                                                                                                                                                                                                                                                                                                                                                                                                                                                                                                                                                                                                                                                                                                                                                                                                                                                                                                                                                                   | GGGGTCTCtAATGTTATTCCAACCGACTTTGTGCGCGCCCTTGGACTCGCCGCTTGTCTGCTCAAGGCGGAGATGCCaGAGACCCCC                |                                                                                                |
| GGF_SP_XPR2pre_D_F       | SSP_10                                                                                                                                                                                                                                                                                                                                                                                                                                                                                                                                                                                                                                                                                                                                                                                                                                                                                                                                                                                                                                                                                                                                                                                                                                                                                                                                                                                                                                                                                                                                                                                                                                                                                                                                                                                                                                                                                                  | GGGGTCTCtAATGAAGTGTCTACCGCCTTACTATTCTACGCGCTTCTTGGCcaGAGACCCCC                                         |                                                                                                |
| GGF_SP_B03564g_x_R       | SSP_11                                                                                                                                                                                                                                                                                                                                                                                                                                                                                                                                                                                                                                                                                                                                                                                                                                                                                                                                                                                                                                                                                                                                                                                                                                                                                                                                                                                                                                                                                                                                                                                                                                                                                                                                                                                                                                                                                                  | GGGGTCTCtGGCAATGGCGACGAGGCCAGCGCGCGGTAACGGCAGCAAATGTGAATTCATTaGAGACCCCC                                | R elements to be<br>aligned with their<br>complementary                                        |
| GGF_SP_D20680g_x_R       | SSP_12                                                                                                                                                                                                                                                                                                                                                                                                                                                                                                                                                                                                                                                                                                                                                                                                                                                                                                                                                                                                                                                                                                                                                                                                                                                                                                                                                                                                                                                                                                                                                                                                                                                                                                                                                                                                                                                                                                  | GGGGTCTCtGGCAGTGGCAGCGCGGCCAGCCAGAGGCGGTTGAGAACTTCATTaGAGACCCCC                                        |                                                                                                |
| GGF_SP_E22374g_x_R       | SSP_13                                                                                                                                                                                                                                                                                                                                                                                                                                                                                                                                                                                                                                                                                                                                                                                                                                                                                                                                                                                                                                                                                                                                                                                                                                                                                                                                                                                                                                                                                                                                                                                                                                                                                                                                                                                                                                                                                                  | GGGGTCTCtGGCAGTGGCCGGGACCGCCAGCAGCAGCAATAGAGATTTCATTaGAGACCCCC                                         |                                                                                                |
| GGF_SP_D06039g_x_R       | SSP_14                                                                                                                                                                                                                                                                                                                                                                                                                                                                                                                                                                                                                                                                                                                                                                                                                                                                                                                                                                                                                                                                                                                                                                                                                                                                                                                                                                                                                                                                                                                                                                                                                                                                                                                                                                                                                                                                                                  | GGGGTCTCtGGCAGCCACCAGCGAGGCCAGGCGAGCAGGATTGAGACCGTGTGAGAACTTCATTaGAGACCCCC                             |                                                                                                |

|                          |        |                                                                                         |                                  |
|--------------------------|--------|-----------------------------------------------------------------------------------------|----------------------------------|
| GGF_SP_D06149g_x_R       | SSP_15 | GGGGTCTCTGGCAGAGGAGACGGCTGCCAGAGCCACGAGAACGATGGAGAGCTTCATTaGAGACCCC                     | strand F – not for amplification |
| GGF_SP_Lip2NATIVE_x_R    | SSP_16 | GGGGTCTCTGGCAGCAGCCAGGGTAGCGCAGGCTGTGAAAAGGATGGTGGAAAAGCTTCATTaGAGACCCC                 |                                  |
| GGF_SP_Lip2pre 3xXA_x_R  | SSP_17 | GGGGTCTCTGGCAAGAGCGAGAGCCAGAGTAGCACAAAGCGGTAACAGAATGGTAGACAGCTTCATTaGAGACCCC            |                                  |
| GGF_SP_SoAMY NATIVE_x_R  | SSP_18 | GGGGTCTCTGGCAGAGGCAACGGAAAAGCAGACAGTAACCAGCAGGGCGAGCACCTTCATTaGAGACCCC                  |                                  |
| GGF_SP_TIGAMY NATIVE_x_R | SSP_19 | GGGGTCTCTGGCATCTCCGCCTTGGACGATCAAGGGCGGAGTCCAAGGGCCGCGCACAAAGTCGGTTGGAATAACATTaGAGACCCC |                                  |
| GGF_SP_XPR2pre_x_R       | SSP_20 | GGGGTCTCTGGCAAGAACGGCCGTGAGAATAGTAAAGCGGTAGCGAGCTTCATTaGAGACCCC                         |                                  |

**Online Resource ESM\_4. (A)** A list of the 54 polypeptides identified through *Yarrowia lipolytica* CLIB122 genomic sequence-mining bearing the motif: MK x{7-15} (x,A/P){2-10} x{10-120} KR. Blue – pre-leader, purple - XA/XP dipeptide motif, black – pro-leader, red – KR dipeptide; the names of the 16 polypeptides eliminated from further analysis (alignment and consensus sequence determination) are crossed out. **(B)** The output data from SignalP and **(C)** Multiple Sequence Alignment (ClustalW) run with the remaining 38 polypeptides.

**(A)**

```

>YALIOA00154g
MKLSNIFALATVVALAAPQLITPPPTAVEKRDDQAVLGADVWIQTMPNGHEKR
>YALIOA08360g
MKPSVIIALAVACMAAPMSPQGAYKDALDIINGQASKFNDAGLKKR
>YALIOA09262g
MKPSVILSLAVACLAAPMAPQGAYKDALDIINGQSSKFSDSSLRKR
>YALIOA10208g
MKLLSILLWISIGLCAAPQLENDYAKLLSMEHLEKR
>YALIOA11198g
MKFSAIAIAAASIVVADPIFLGKPAAGVDPNTFWSQSTPTPAPPPPAPTTQAPPPPAPTSSQAAQETCIAPASTNEKR
->YALIOA17534g
MKIPGTVPLVESTEILSPTSSDDPDDPLNWSPRRKLSMFCMVLVCAFCVPSASIFSVFIPISQTGLPLATLNQTGYMFLLFLGCIVHPLSVKYGKR
>YALIOA20350g
MKLSTILTFTACATLAAALPSPITPSEAAVLQKR
->YALIOA20790g
MKFSLKSTTQTPDSPPEEEETLAEEPTDPAIRTSFGDVVLTDVSCKDELKEVHMGYLNDQCYVIDNFAPTLLSQYVHIMAGRIKFTISEMTRMADRAFLVLTELEPPKKR
->YALIOB03564g
MKFTFAAVTAALSAMALGGLVDLGVKR
>YALIOB05104g
MKLSTIAISAILSVALAAPAQEELRSTAMLIQSEEFQRLNYDEGLSLDRDELRLVETAPGVRTWMTEAEKLVLKR
->YALIOB07293g
MKKQNLNALYPHPYFYVDVVPIHNPISVYFLCRWIFAGNTSPEYTAEYDVGVVRAVGDAREGLWKMGFGGLSRSEPSWDIRTKRLGLHVEEGVYAPEVTQRFRRQRQHFAERAKAEEEELKR
>YALIOB08778g
MKVAHIQLAAMVATALAAVLAIDYGQEYTKAALSPGINFEIVLTQDSKRKQPSAIGFKGKADSKFLERVYGSPAVLMEPRFPSDVVLYHKR
->YALIOB09713g
MKRKMEEDIPTEPPSAKQPRQSMASVSACVCRKRKSKCDQKFPSCSRCLAAGVVCMGLDAATKR
>YALIOB15510g
MKLSTLVLAALTAVAVADDYKSICDVDNHCPEDKPCCSYGECGTGAYCLGGCDPKSSEFELKSCMPMPVCKKR
>YALIOB16500g
MKFNPVISAVAMAALAQALLPQNVDAEAFNTLLTDNEANSPNHHAKAFEKIVIANEDESEIAPLVMNDKEQVPDSYIVVFKEDVDASTASHELWVEQVHTEQVASLAKR
>YALIOB22880g
MKFTLLLAGLSLVAAPADASASASYNLVNIINKHQGHHAKR
->YALIOC14564g
MKILTIDVFGLFVPRPSVPAQYLRIVQQHEKCSATVAQVQAGFHKAFKR
>YALIOC15851g
MKSAIGYMAVAVAAASCQFTVDSKNYDLSAISGPKSVEYTIETPPSKR
>YALIOD00759g
MKTSHTVALLAVATAAAIRVDSGNAVTLDIVKR
>YALIOD02024g
MKLTTTTLLSLASASFRPFSGHEIAKAARENVPSLGEQAILPKSPFKAASPLQNKASSGGTSVATSSVDCKRFVEIQDGGDVSYVNTQLGSSQAEYRMLVDTGSYMWVYSENCTSTACMKR
>YALIOD02981g
MKLATSLTLFTAVLAPLAAPAPDVAPAVAEGSASASASAILSVVSKQSKFSALQKR
>YALIOD04851g
MKFSTLSVAALAASASASALDPEVEKGNAFVGDKR
>YALIOD06039g
MKFSASIAALASLVAAADVPSIDIVGNKFFSNNSQFYIRGVAYQDSANETAKETFSDPLSDGDACKR
>YALIOD06149g
MKLSIVLVAAAVSAQPIVGVYDRDSAETVYQHFADAHVETRDLTKR
>YALIOD08206g
MKFSATILTALASAVANYAPIKVECPKDVNSRPDGLSHQEADYINERHKKTSKALREYLGLDIKARGNTFDTDSFLNETSPKLAIAAGGGFRAMLVGAGVIAALDKR
>YALIOD20680g

```



MKFSTALLAALAAVATAQPIVGHHAHHQHKR  
>YALIO022616g  
MKHLKSVAIIGGPPSAAPCIKALLAENYFGKITAYEQQPAPGAGVWYNYGLTRPTNLPCTDRMPAEPHKKDGSIIYNPMYRDLNTPHMLMAYKDFPFPEGVDLFPKR  
>YALIO025102g  
MKDLPTTIVTLQSQYPPGAQIQLRVHIGDHSKPLRQQCLEKALAIQRQSTRQVEAYERILKR  
>YALIO026554g  
MKFSVLLLAGAVLALPTATVVNTEAIDYSTITDLPGSEPTDVSLEKRADPFKR  
>YALIOE00110g  
MKIDIALVLLATAVSAAPPTFSKIQSPDAIASAAATAKSNHWKDEGYETVKGQVFDKYYQIWLENTNYDKAFGQADLKALTDGILLTNYWSLTHPSQPNYIAAVSGDYFGDMTDSFKR  
>YALIO04785g  
MKHPYHIVSLSPDGKTMVAAAARQVDRICLETGECKSTVVEESATRTTKTGDKPAAAKRTKYLPTSVSHVRSLSLQSGGKYLATTDETKSLVLLDPTTLEVIKKVQYPKR  
>YALIOE05423g  
MKLLNIFTIATVASAMSLRRQEPISHVEPADTIFHIDPDLQPHSSFSLSVKVPIPEGGAHYNRLQQRWYVHADPNARRDAESFFKKR  
>YALIOE05819g  
MKFSIVLPLAGALLAAGPIQHPMEGCVPRSVFDLGDCLDCNDFLVSDDPEQCLQCLTVYELDNKNTVLSTLEEQLPMQPEVPCVGSAPMITPGAIPVLAKR  
>YALIOE09757g  
MKITRPNLHNLHNSPNPQSCGGAALGRSLNSQSSLPSTMDQTIHTPHGYLSRNNISSTVATSEDEGMYSDLSNPLTSISNQFWPEHDDAFLMHYIKVVDNPTIAPFVGHTPPSGIIHRVAKDCAKR  
>YALIOE16533g  
MKFSTIALAAVACLVSAAAPAVGTGSHGQPISEIAIVGGLQGTENEIVFFNDDESQKGIADAKKAQEAQMDPQDPDEVAAGNAKREASPEAWRWFVLPYGEPNWKRADAMPADMKEKR  
>YALIOE21229g  
MKLYYIGILRPNKPEVQLASASDLSYSWFERSTVGOAFTFLAETVIPRTEPGQRQSEVENDYVGHAYLRSDGLGGVIITDQEYPPRVAYTLLNKVLEEYTKHPKAEWENAKEASSKLAMPELEDYVVKR  
>YALIOE22374g  
MKSLLLSLLAVPATAQLLLDLQGHDTTDRHQSQNHLLTKR  
>YALIOE26719g  
MKLATAFTILTAVLAAPLAAPAEAFLLLAGFAAKISASMTNETSDRPLVHFTPNKGMNDPNGLWYDEKDAKWHLYFYQNPNDTVWGTPLFWGHATSDDLTNWEDQPIAIAPKR  
>YALIOE28875g  
MKFSAIVSLFAVAVAAQKSIEQIVSEHQERFLAKR  
>YALIOE30415g  
MKFSTIALSIMAAVAIAPIAQEPAEVPVAPEAPAAPNMDDLKQLQGLQVQLNVLFTNDNEQFIVEDDGTSLRLLVDTTLIGSEGLAKREANPEAWRWFVLPYGEPNWKRADAMPADVDKRKR  
>YALIOE31064g  
MKFNHSLQFNAPFEWTSEYIAYSQKLIYSLERTALGVPNYEDENSTLIREADSNPEDFIKR  
>YALIOE32703g  
MKFSKTLALLLAVAGALAKGEDEICRVEKNSGKEICYPKVFVPTTEWQVVPDQVIPAGLHVSRMDYENGVEKAKINDPNEEVEGVAVAVGEEVPEGEVIEDLTHEENGDEGISANEKQVRAIEKAIKVKR  
>YALIOE33539g  
MKFSTLALAAMAAGFAAPATPDADCNEEKEVRDFHAHHQHKKR  
>YALIOE34133g  
MKAWHWSVTLVVIYLAIPVILYLLTRKDDRKPLSDIRKRRK  
>YALIOE34852g  
MKFLVCLLVLALASVVSANVLLLPWK  
>YALIOF05390g  
MKLTKLVALAGAAASPIQLVPREGSFLGFNYGSEKVGVLGGWVFLVLEPITPSLFEAFGNNDANVPVDEYHYTAWLGKEEAER  
>YALIOF05786g  
MKFSTVLLTAAVAAAELITLDWAETTQVISIPDATAGEQATSAVLSAAYDAIHDHLAAQTTPAPDAEKAEALDLTIQAPFFTMGLWIPDLSDFGIGTKNETISEWLHRIWEEKQGVAPNRR  
>YALIOF11803g  
MKTAAILSCLGLVASAIPDFTTSSQFPTKR  
>YALIOF12067g  
MKFSNVLLISALSAASVAAPVAPEPKNVVWPKVDPNVLPGPEKRTLEKR  
>YALIOF12969g  
MKIPNVSTPPAVPSLTKPLTVTKTKPKAKKEEPQEPQDMSLHLQLMLSTDNVQNNFSFDEFLQVPIVKDAIKTKR  
>YALIOF19030g  
MKFSATLLAAAVSVAVADPILGKGPDPNTFWFSQSPGAPAPSNPPAAPAPKPNPGGVDNPTFWFSQSSTPTAPPAPAPSTQAPAPPASSPAPPASSAAPAPQPEETCIAPAGAQEKR  
>YALIOF19646g  
MKLSLLLLSTLAVALPIAQQPASEYNQLDLINNQDLEKR  
>YALIOF20966g  
MKTSLQLRRNLPGAAAVWPPDFGKVFYGLSVAIGAATKAVRVSTFTAFSKFMADEDNRRTAPRVVVTAGLLTGITESFIVVPFESIKTMINRVQVAAGKPVAVPPEIKLEKPEPETAAGKPVETAPVTIKDKKR  
>YALIOF31251g  
MKLPILASLSGLAGLFTAHAFGAGNIPSDSSIEGKFRHGDIEDVLAGIVISHRGGKARKFDGLDIKR

**(B)**

SignalP output data

##gff-version 2

##sequence-name source feature start end score N/A ?

| ##           | -----       | -----  | ----- | ----- | ----- | ----- | ----- | ----- | ----- |
|--------------|-------------|--------|-------|-------|-------|-------|-------|-------|-------|
| YALIOA00154g | SignalP-4.1 | SIGNAL | 1     | 15    | 0.639 | .     | .     | YES   |       |
| YALIOA08360g | SignalP-4.1 | SIGNAL | 1     | 15    | 0.513 | .     | .     | YES   |       |
| YALIOA09262g | SignalP-4.1 | SIGNAL | 1     | 15    | 0.617 | .     | .     | YES   |       |
| YALIOA10208g | SignalP-4.1 | SIGNAL | 1     | 17    | 0.780 | .     | .     | YES   |       |
| YALIOA11198g | SignalP-4.1 | SIGNAL | 1     | 17    | 0.586 | .     | .     | YES   |       |
| YALIOA20350g | SignalP-4.1 | SIGNAL | 1     | 17    | 0.571 | .     | .     | YES   |       |
| YALIOB05104g | SignalP-4.1 | SIGNAL | 1     | 18    | 0.685 | .     | .     | YES   |       |
| YALIOB08778g | SignalP-4.1 | SIGNAL | 1     | 18    | 0.618 | .     | .     | YES   |       |
| YALIOB15510g | SignalP-4.1 | SIGNAL | 1     | 17    | 0.770 | .     | .     | YES   |       |
| YALIOB16500g | SignalP-4.1 | SIGNAL | 1     | 27    | 0.572 | .     | .     | YES   |       |
| YALIOB22880g | SignalP-4.1 | SIGNAL | 1     | 15    | 0.767 | .     | .     | YES   |       |
| YALIOC15851g | SignalP-4.1 | SIGNAL | 1     | 15    | 0.451 | .     | .     | YES   |       |
| YALIOD00759g | SignalP-4.1 | SIGNAL | 1     | 19    | 0.539 | .     | .     | YES   |       |
| YALIOD02024g | SignalP-4.1 | SIGNAL | 1     | 17    | 0.702 | .     | .     | YES   |       |
| YALIOD02981g | SignalP-4.1 | SIGNAL | 1     | 15    | 0.818 | .     | .     | YES   |       |
| YALIOD04851g | SignalP-4.1 | SIGNAL | 1     | 18    | 0.555 | .     | .     | YES   |       |
| YALIOD06039g | SignalP-4.1 | SIGNAL | 1     | 18    | 0.820 | .     | .     | YES   |       |
| YALIOD06149g | SignalP-4.1 | SIGNAL | 1     | 16    | 0.822 | .     | .     | YES   |       |
| YALIOD08206g | SignalP-4.1 | SIGNAL | 1     | 17    | 0.582 | .     | .     | YES   |       |
| YALIOD20680g | SignalP-4.1 | SIGNAL | 1     | 16    | 0.600 | .     | .     | YES   |       |
| YALIOD26554g | SignalP-4.1 | SIGNAL | 1     | 23    | 0.623 | .     | .     | YES   |       |
| YALIOE00110g | SignalP-4.1 | SIGNAL | 1     | 17    | 0.811 | .     | .     | YES   |       |
| YALIOE05423g | SignalP-4.1 | SIGNAL | 1     | 15    | 0.490 | .     | .     | YES   |       |
| YALIOE05819g | SignalP-4.1 | SIGNAL | 1     | 17    | 0.689 | .     | .     | YES   |       |
| YALIOE16533g | SignalP-4.1 | SIGNAL | 1     | 20    | 0.771 | .     | .     | YES   |       |
| YALIOE22374g | SignalP-4.1 | SIGNAL | 1     | 15    | 0.755 | .     | .     | YES   |       |
| YALIOE26719g | SignalP-4.1 | SIGNAL | 1     | 24    | 0.588 | .     | .     | YES   |       |
| YALIOE28875g | SignalP-4.1 | SIGNAL | 1     | 16    | 0.540 | .     | .     | YES   |       |
| YALIOE30415g | SignalP-4.1 | SIGNAL | 1     | 17    | 0.736 | .     | .     | YES   |       |
| YALIOE32703g | SignalP-4.1 | SIGNAL | 1     | 17    | 0.759 | .     | .     | YES   |       |
| YALIOE33539g | SignalP-4.1 | SIGNAL | 1     | 19    | 0.622 | .     | .     | YES   |       |
| YALIOF05390g | SignalP-4.1 | SIGNAL | 1     | 15    | 0.570 | .     | .     | YES   |       |
| YALIOF05786g | SignalP-4.1 | SIGNAL | 1     | 23    | 0.623 | .     | .     | YES   |       |
| YALIOF11803g | SignalP-4.1 | SIGNAL | 1     | 15    | 0.556 | .     | .     | YES   |       |
| YALIOF12067g | SignalP-4.1 | SIGNAL | 1     | 18    | 0.697 | .     | .     | YES   |       |
| YALIOF19030g | SignalP-4.1 | SIGNAL | 1     | 17    | 0.748 | .     | .     | YES   |       |
| YALIOF19646g | SignalP-4.1 | SIGNAL | 1     | 14    | 0.674 | .     | .     | YES   |       |
| YALIOF31251g | SignalP-4.1 | SIGNAL | 1     | 21    | 0.641 | .     | .     | YES   |       |

(c)

Multiple Sequence Alignment ClustalW (MEGA 7.0 Package)

| Gene Name    | MSA                           |
|--------------|-------------------------------|
| YALI0A00154g | --MKLSNIFALATVALAAPQP-----    |
| YALI0A08360g | --MKPSVIALAVACMAAP-----       |
| YALI0A09262g | --MKPSVILSLAVACLAAPMA-----    |
| YALI0A10208g | --MKLLSILLWISIGLCAAIP-----    |
| YALI0A11198g | --MKFSATAIA-AAASIVVADP-----   |
| YALI0A20350g | --MKLSTILFTACATLAAALPSP-----  |
| YALI0B05104g | --MKLSTIAISAILGSVALAAP-----   |
| YALI0B08778g | --MKVAHIQLAAMVATALAAVLA----   |
| YALI0B15510g | --MKLSTLVLA-ALTAVAVA-----     |
| YALI0B16500g | --MKFNPVISAVAMAALQA-----      |
| YALI0B22880g | --MKFTLLLAGLSLVAAAPADADASA--  |
| YALI0C15851g | --MKSATIGYMAVAVAAA-----       |
| YALI0D00759g | --MKTSHITVA-LLAAVATA-----     |
| YALI0D02024g | --MKLTT-TLLALSSLSA-----       |
| YALI0D02981g | --MKLATSLLFTAVLAAPLAAPAP---   |
| YALI0D04851g | --MKFSTLSVAAALAASASA-----     |
| YALI0D06039g | --MKFSAVSIAAALASLVAAA-----    |
| YALI0D06149g | --MKLSIVLVALAAVSSAQP-----     |
| YALI0D08206g | --MKFSATILT-ALAASAVA-----     |
| YALI0D20680g | --MKFSTALLALAAVATA-----       |
| YALI0D26554g | --MKFSVLLLAGAVLALPTAT-----    |
| YALI0E00110g | MKIDIALVLLATAVSAAPP-----      |
| YALI0E05423g | --MKLLNIFTIATVASA-----        |
| YALI0E05819g | --MKFSIVLPLAGALLAAA-----      |
| YALI0E16533g | --MKFSTIALA-AVACLVSAAAPAAP--- |
| YALI0E22374g | --MK-SLLS----LLAVPATA-----    |
| YALI0E26719g | --MKLATAFTILTAVLAAPLAAPAEA--  |
| YALI0E28875g | --MKFSIVSL-FAVAVA-----        |
| YALI0E30415g | --MKFSTIALS-IMAAVAIAPIA----   |
| YALI0E32703g | --MKFSKTLAL-ALVAGALA-----     |
| YALI0E33539g | --MKFSTLALA-AMAAIGFAAPATPDA-  |
| YALI0F05390g | --MKLTKLVALAG-AALASP-----     |
| YALI0F05786g | --MKFSTVLLTAAVAAA-----        |
| YALI0F11803g | --MKTAAILSC-LGLVVASAIP-----   |
| YALI0F12067g | --MKFSNLLISALSAASVAAPVAEPEP   |
| YALI0F19030g | --MKFSATLLA-AAVSVAVADP-----   |
| YALI0F19646g | --MKLSLLLLS---TLAVALPIA----   |
| YALI0F31251g | --MKLPILASLSGLAGLFTTAHA-----  |
